# Supplementary material for: Hypoxia acts as an environmental cue for the human tissue-resident memory T cell differentiation program
Source: PubMed Central journal article supplement (PMC8262358; doi:10.1172/jci.insight.138970), 2021-05-24
Supplement: jciinsight-6-138970-s195.pdf [file jciinsight-6-138970-s195.pdf]

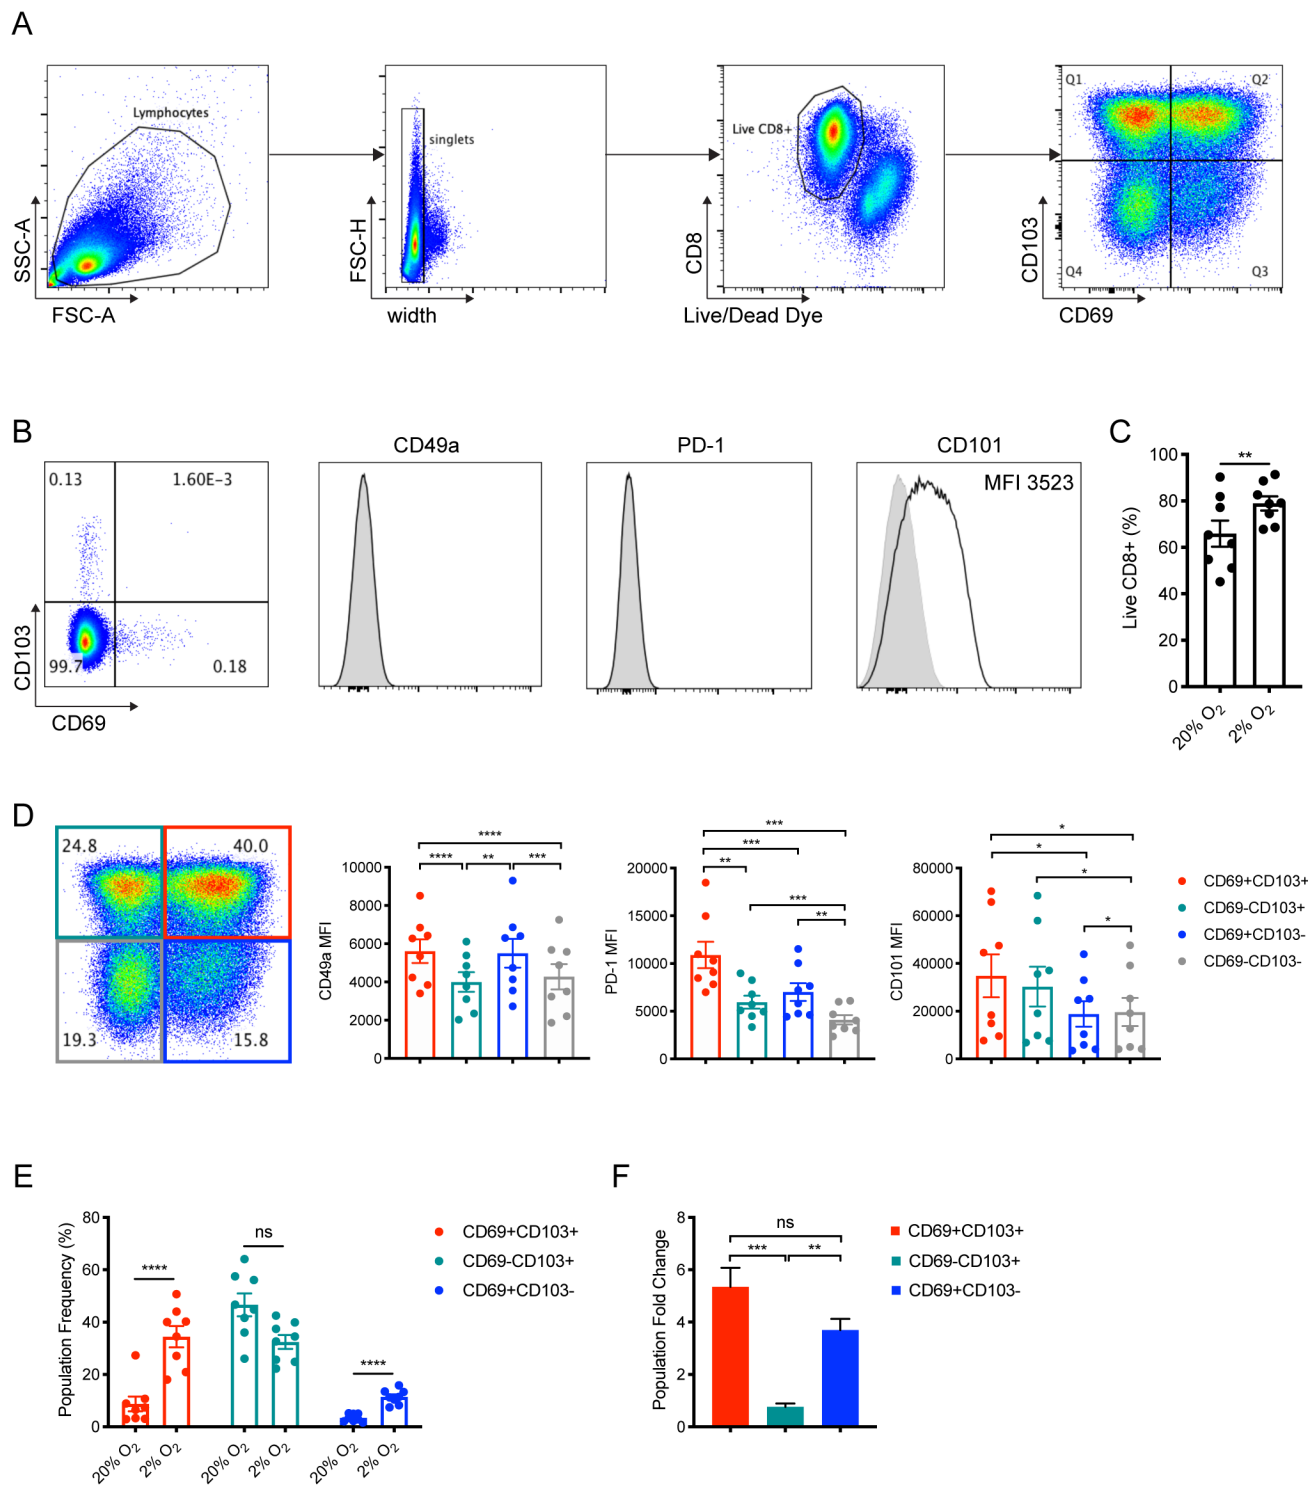

**Supplemental Figure 1. Differentiation of human CD8<sup>+</sup> T-cells in hypoxia and TGF- $\beta$ 1 results in induction of a CD69<sup>+</sup>CD103<sup>+</sup> population. (A)** Gating strategy used in flow cytometry analysis. **(B)** Naïve CD8<sup>+</sup> T-cells were sorted from human PBMCs and assessed for expression of T<sub>RM</sub>-associated markers by flow cytometry; gray histograms represent FMO. Naïve CD8<sup>+</sup> T-cells were activated as described in Figure 1. **(C)** Cell viability determined by fixable viability dye (Invitrogen) in flow cytometry analysis and **(D)** expression of T<sub>RM</sub>-associated markers was assessed by flow cytometry. **(E and F)** Changes in population frequencies comparing 20% O<sub>2</sub> + TGF- $\beta$ 1 and 2% O<sub>2</sub> + TGF- $\beta$ 1 conditions determined by flow cytometry.  $n = 8$ , 3 independent experiments; paired t-test **(C)**, ratio paired t-test **(C)**, or repeated measures one-way ANOVA followed by Tukey's **(D)** or Sidak's **(E and F)** multiple comparisons test; \* $P < 0.05$ , \*\* $P < 0.01$ , \*\*\* $P < 0.001$ , \*\*\*\* $P < 0.0001$ , data are mean  $\pm$  SEM.

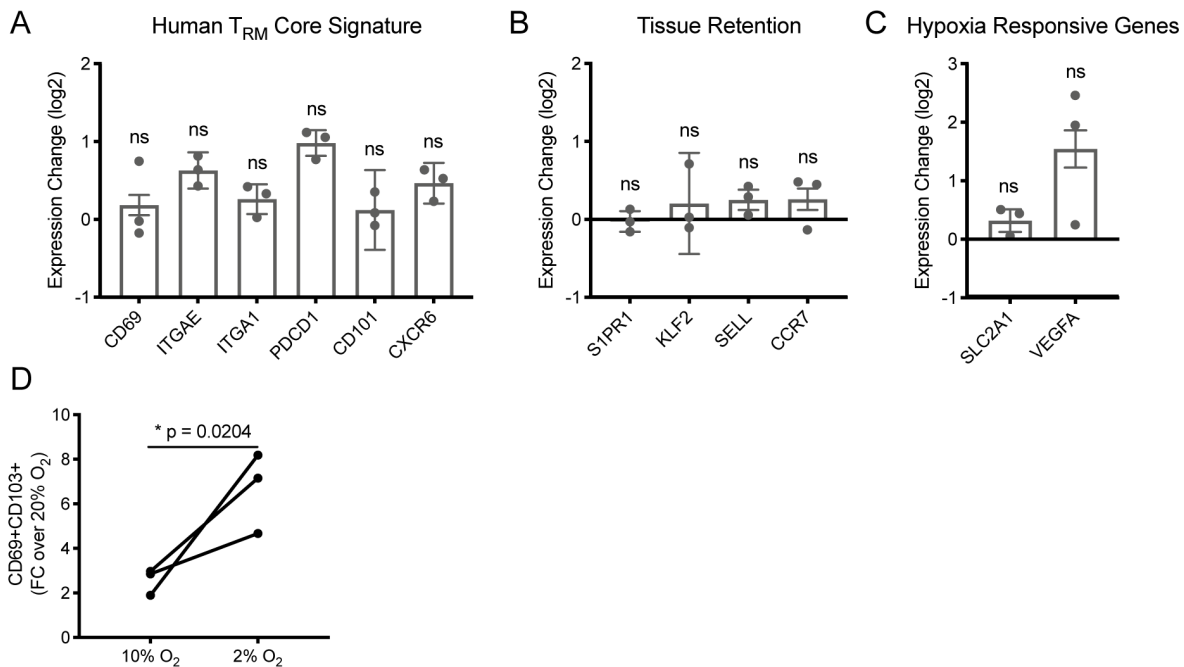

**Supplemental Figure 2. Human CD8<sup>+</sup> T-cells differentiated in 10% O<sub>2</sub> and TGF- $\beta$ 1 do not have a  $T_{RM}$ -like transcriptional profile.** Naïve CD8<sup>+</sup> T-cells isolated from PBMCs were activated in 20% O<sub>2</sub> (AtmosO<sub>2</sub>) or 10% O<sub>2</sub> (circulationO<sub>2</sub>) for 4 days and then for an additional 2 days with the addition of rhTGF- $\beta$ 1. Expression levels of  $T_{RM}$ -associated genes were analyzed via quantitative real-time PCR. **(A-C)** Fold change of gene transcript levels in 10% O<sub>2</sub> + TGF- $\beta$ 1 over 20% O<sub>2</sub> + TGF- $\beta$ 1. **(D)** The frequency of the CD69+CD103<sup>+</sup>  $T_{RM}$ -like population was assessed by flow cytometry and compared to cultures activated in 2% O<sub>2</sub> (with TGF- $\beta$ 1 on day 4) by normalization to parallel cultures at 20% O<sub>2</sub>.  $n = 3$ , 2 independent experiments; **(A-C)** Paired t-test with Benjamini, Krieger and Yekutieli correction for multiple comparisons; FDR < 0.05, data are mean  $\pm$  SEM; **(D)** unpaired t-test, \* $P < 0.05$ .

### CD69+CD103+ vs CD69+CD103-

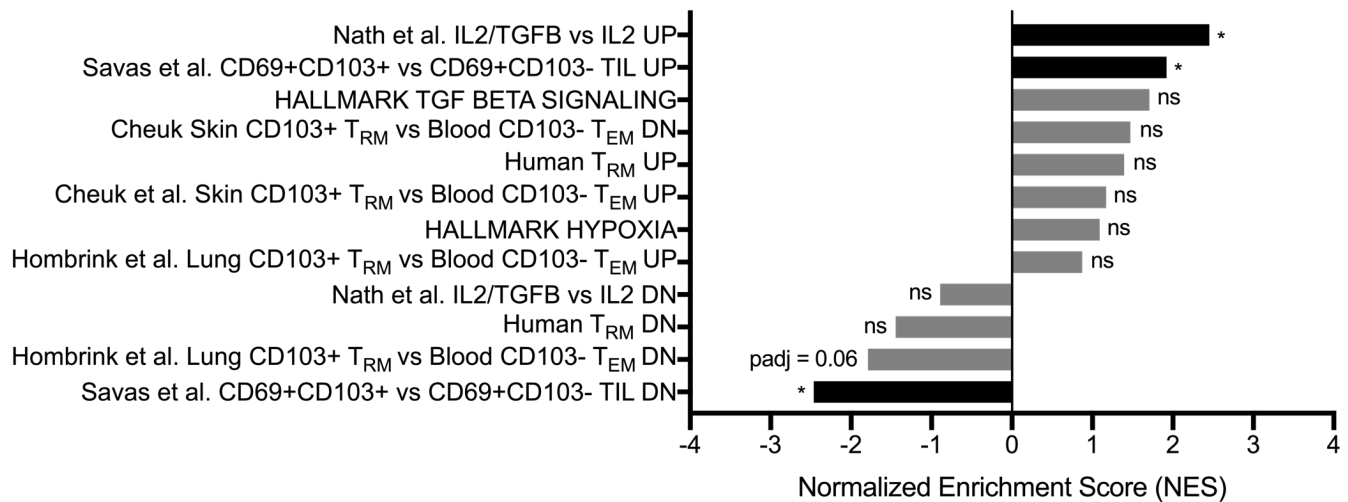

### CD69+CD103- vs CD69-CD103-

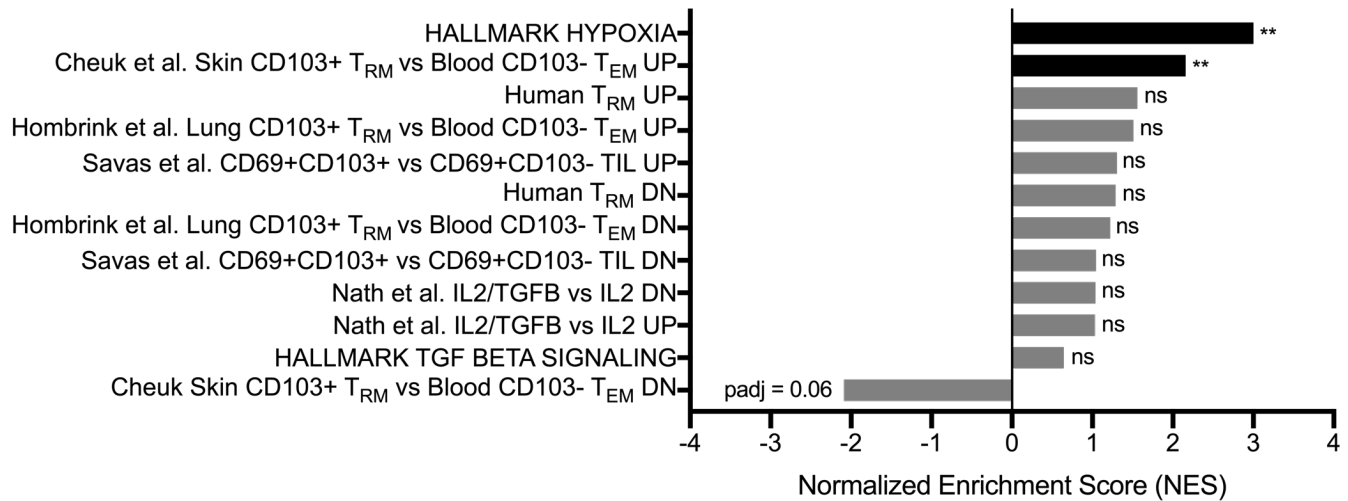

**Supplemental Figure 3. GSEA of cells differentiated in hypoxia + TGF- $\beta$ 1 (CD69+CD103+) and hypoxia alone (CD69+CD103-).** CD69-CD103- (20% O<sub>2</sub>), CD69+CD103- (2% O<sub>2</sub>), and CD69+CD103+ (2% O<sub>2</sub> + TGF- $\beta$ 1) CD8+ T-cells were generated as described earlier and sorted before RNA isolation and transcriptome analysis via RNA-sequencing ( $n = 3$ ). GSEA of relevant gene signatures derived from endogenous T<sub>RM</sub> and TIL<sub>RM</sub>, presented as normalized enrichment score (NES), \* $padj < 0.05$ , \*\* $padj < 0.01$ .

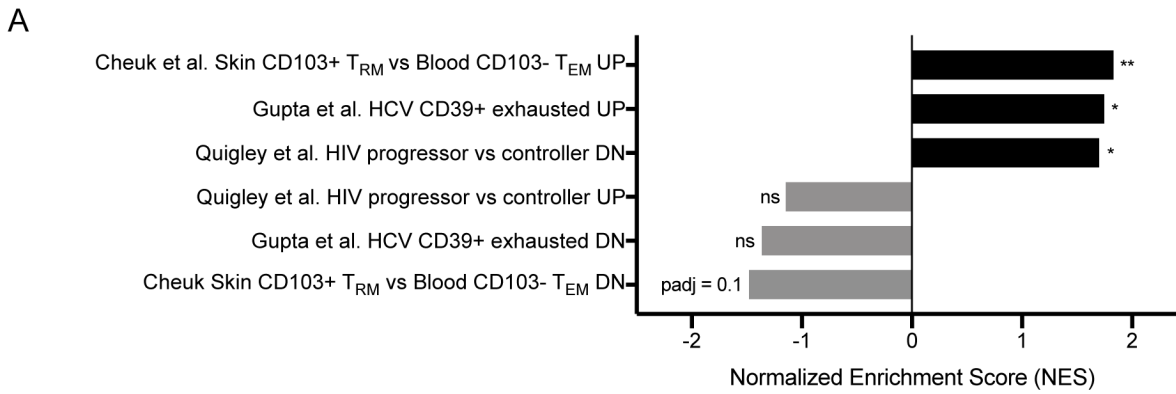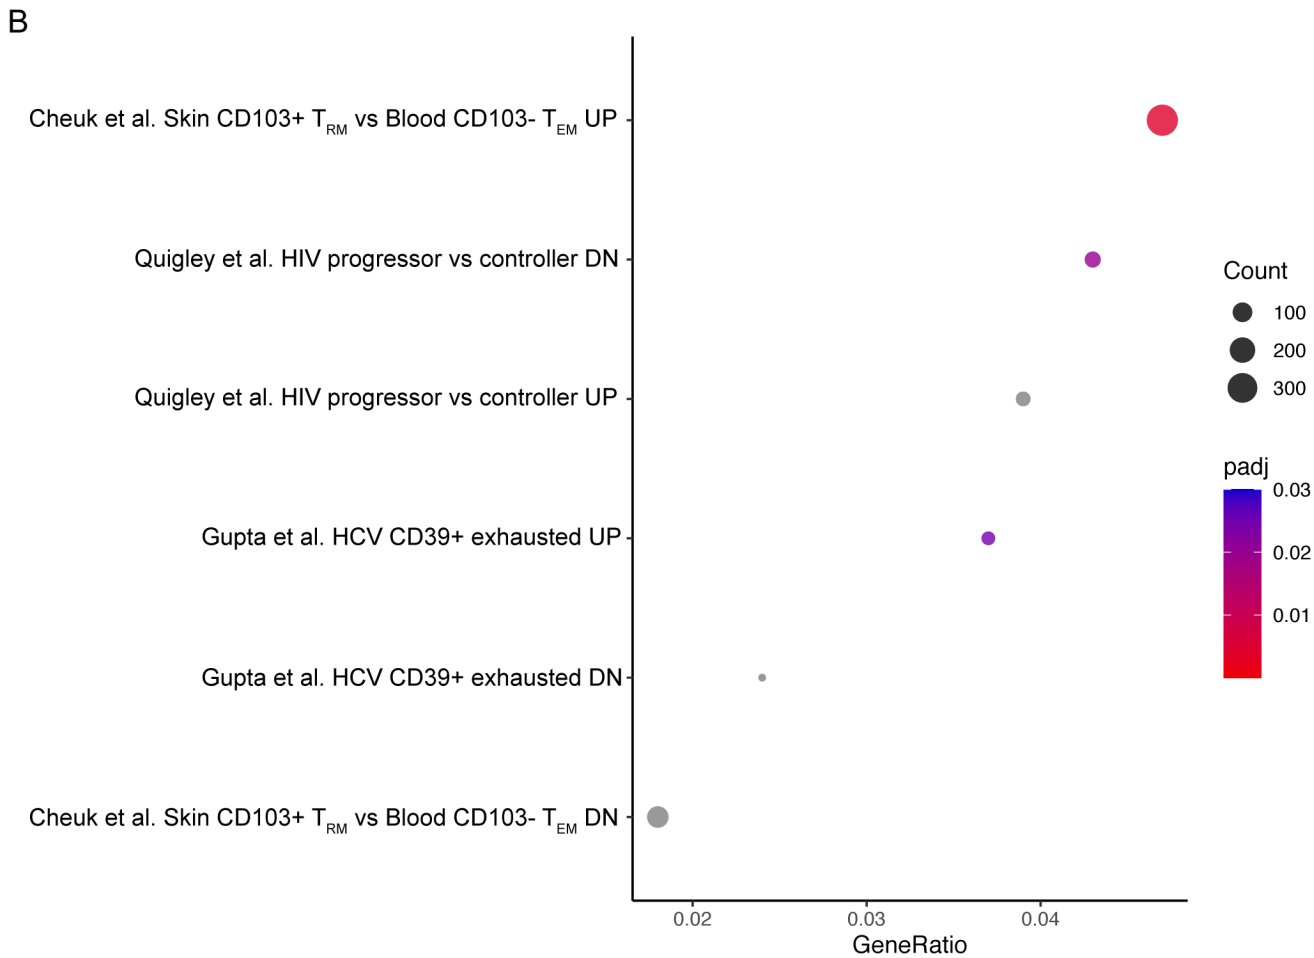

**Supplemental Figure 4. Hypoxia and TGF- $\beta$ 1 induced T<sub>RM</sub>-phenotype cells do not exhibit an exhaustion signature.** CD69-CD103- (20% O<sub>2</sub>) and CD69+CD103+ (2% O<sub>2</sub> + TGF- $\beta$ 1) CD8+ T-cells were generated as described earlier and sorted before RNA isolation and transcriptome analysis via RNA-sequencing ( $n = 3$ ). **(A and B)** GSEA of published human T-cell exhaustion signatures in the transcriptome of CD69+CD103+ vs. CD69-CD103-, presented as normalized enrichment score, \* $padj < 0.05$ , \*\* $padj < 0.01$ . **(B)** Count refers to the number of enriched genes, GeneRatio refers to the ratio of enriched genes to the total geneset.

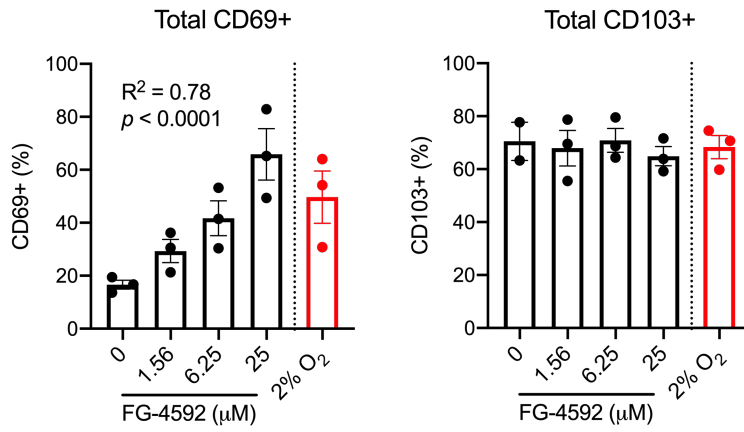

**Supplemental Figure 5. HIF stabilization primarily drives CD69 expression.** Naïve CD8<sup>+</sup> T-cells were activated in 20% O<sub>2</sub> (AtmosO<sub>2</sub>) in the presence of FG-4592 for 4 days and then for an additional 2 days with TGF-β1. Cells activated in 2% O<sub>2</sub> with addition of TGF-β1 on day 4 are shown in red for comparison. Frequency of the total CD69<sup>+</sup> population and total CD103<sup>+</sup> population was assessed by flow cytometry. *n* = 3, one-way ANOVA followed by test for trend, data are mean ± SEM.
